# Supplementary material for: Ultrathin vanadium hydroxide nanosheets assembled on the surface of Ni–Fe-layered hydroxides as hierarchical catalysts for the oxygen evolution reaction
Source: Royal Society of Chemistry journal article supplement (doi:10.1039/d0dt03802d), 2020-12-09
Supplement: d0dt03802d1.pdf [file d0dt03802d1.pdf]

## Supporting Information

### Ultrathin Vanadium Hydroxide Nanosheets Assembled on the Surface of Ni-Fe Layered Hydroxides as a Hierarchical Catalyst for Oxygen Evolution Reaction

Jiaruo Tang, Xiaoli Jiang, Lin Tang, Yao Li, Qiaoji Zheng\*, Yu Huo,

Dunmin Lin

College of Chemistry and Materials Science, Sichuan Normal University, Chengdu 610066

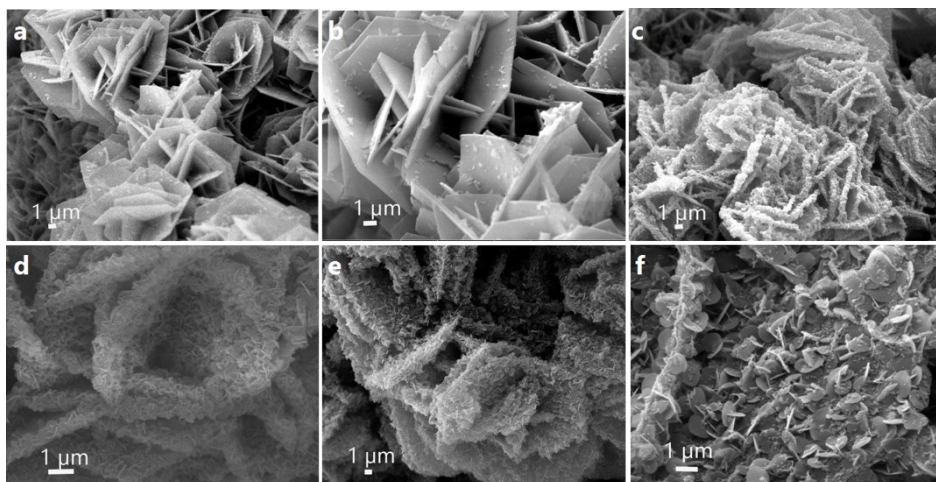

**Fig. S1.** (a-b) SEM images of NiFe LDHs/NF; (c-d) SEM images of NFV NSs-8h;

\*Corresponding authors: Tel.: +86 28 84760802; Fax: +86 28 84760802; E-mail:

joyce@sicnu.edu.cn (Qiaoji Zheng)

and (e-f) SEM images of NiFe NFV NSs-12h.

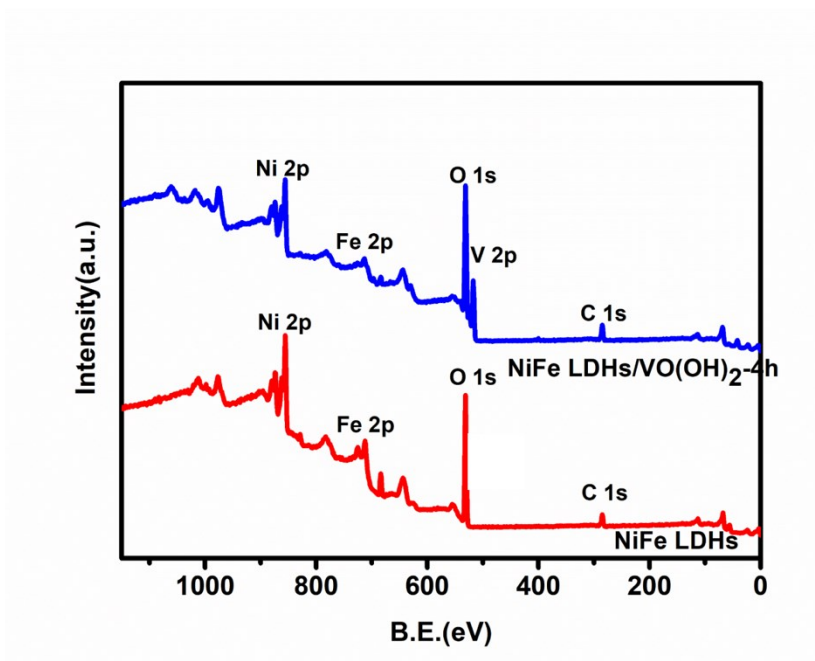

Fig. S2. XPS survey spectra of NFV NSs-4h and NiFe LDHs/NF.

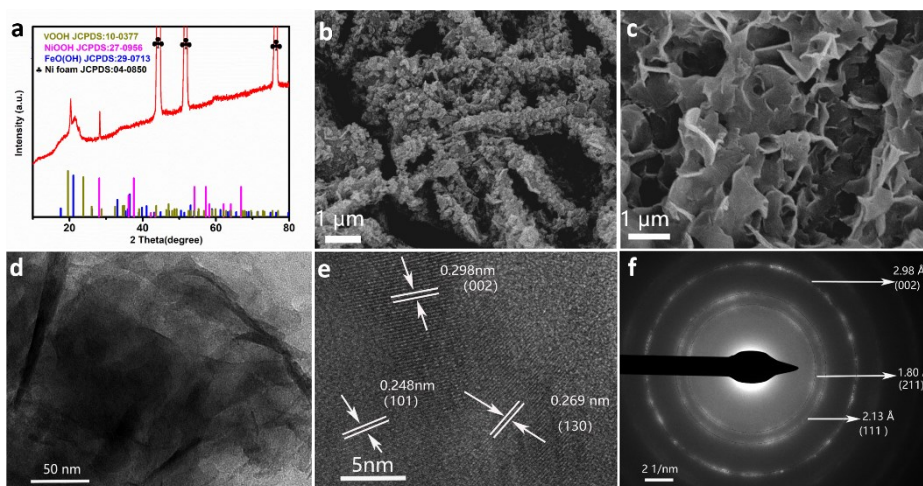

**Fig. S3.** (a) XRD patterns of NFV NSs-4h after long-term OER process; (b-c) SEM images; (d) TEM image, (e) HR-TEM image and (f) SAED patterns of NFV NSs-4h after OER.

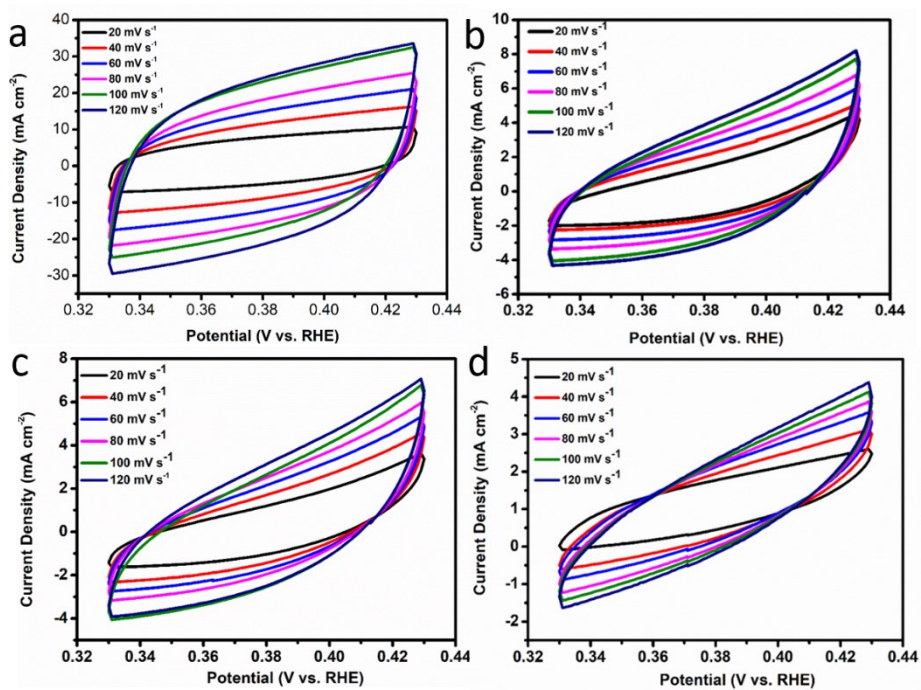

**Fig. S4.** CV curves of (a) NFV NSs-4h, (b) NFV NSs-8h, (c) NFV NSs-12h, (d)

NiFe LDHs/NF.

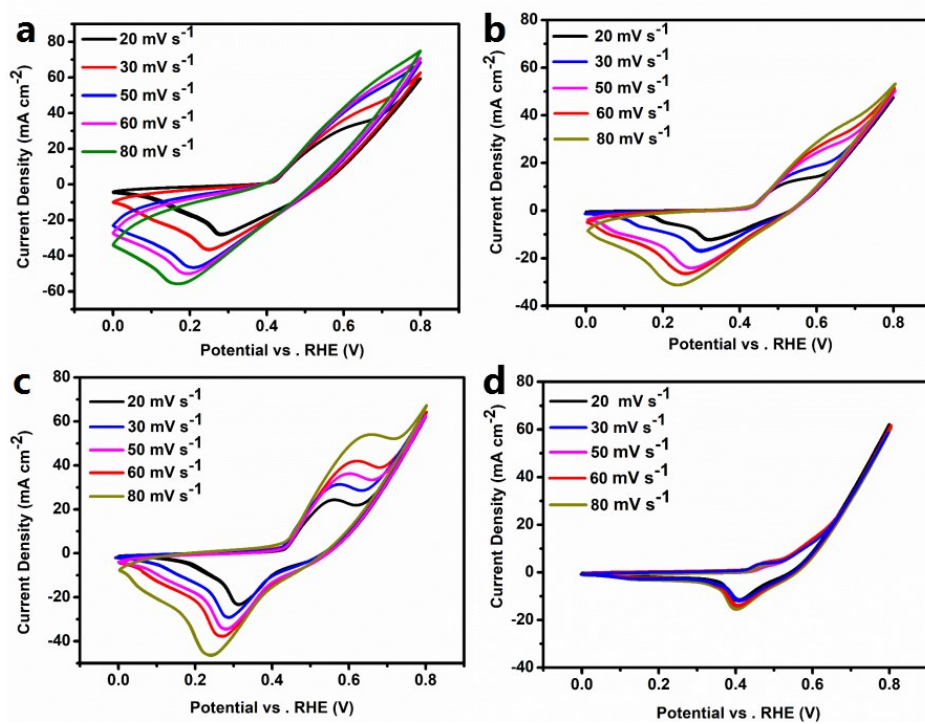

**Fig. S5.** CVs for NiFe-LDHs and NFV NSs-xh (4,8,12) in faradic capacitance current range at various scan rates: (a) NFV NSs-4h, (b) NFV NSs-8h, (c) NFV NSs-12h, (d) NiFe LDHs/NF.

**Table S1.** Comparison of the OER performance for the obtained materials in this work with other state-of-the-art OER electrocatalysts.

| Catalyst                                                                             | Electrolyte | $\eta_{j=100}$ (mV) | $\eta_{j=200}$ (mV) | Tafel slope [mV dec <sup>-1</sup> ] | Reference |
|--------------------------------------------------------------------------------------|-------------|---------------------|---------------------|-------------------------------------|-----------|
| NFV NSs-4h                                                                           | 1 M KOH     | 280                 | 300                 | 65                                  | This work |
| NFV NSs-8h                                                                           | 1 M KOH     | 300                 | 320                 | 84                                  | This work |
| NFV NSs-12h                                                                          | 1 M KOH     | 320                 | 350                 | 112                                 | This work |
| NiFe LDHs                                                                            | 1 M KOH     | 310                 | 330                 | 96                                  | This work |
| CS-NiFeCu                                                                            | 1 M KOH     | ~210                | ~240                | 33                                  | 1         |
| NiFe <sub>2</sub> O <sub>4</sub>                                                     | 1 M KOH     | ~210                | /                   | 46.4                                | 2         |
| NiCoFe-LDH HP                                                                        | 1 M KOH     | 332                 | ~340                | 56                                  | 3         |
| 0.1Fe-CoNiO/NF                                                                       | 1 M KOH     | ~280                | /                   | 36.8                                | 4         |
| Fe <sub>3</sub> O <sub>4</sub> -FeSe/CoSe <sub>2</sub>                               | 1 M KOH     | ~350                | ~370                | 68.7                                | 5         |
| Co <sub>2.4</sub> Ni <sub>0.6</sub> Ge <sub>2</sub> O <sub>5</sub> (OH) <sub>4</sub> | 1 M KOH     | 349                 | ~370                | 59.8                                | 6         |
| Cu oxide micro/nano-structures                                                       | 1 M KOH     | ~350                | ~370                | 63                                  | 7         |
| NF@NC-CoFe <sub>2</sub> O <sub>4</sub> /C NRAs                                       | 1 M KOH     | ~290                | ~310                | 45                                  | 8         |

## Experimental

### 1.1 Materials and chemicals

Ammonia fluoride ( $\text{NH}_4\text{F}$ , 96.0%), nickel nitrate hexahydrate ( $\text{Ni}(\text{NO}_3)_2 \cdot 6\text{H}_2\text{O}$ , 99.0%) and anhydrous ethanal ( $\text{CH}_3\text{CH}_2\text{OH}$ , 99.7%) were purchased from Sinopharm Chemical Reagent Co., Ltd. Vanadium trichloride ( $\text{VCl}_3$ , 99.0%) and urea ( $\text{CH}_4\text{N}_2\text{O}$ , 99%) were obtained from Aladdin. Iron chloride hexahydrate ( $\text{FeCl}_3 \cdot 6\text{H}_2\text{O}$ , 99.0%) was supplied by Kelong Chemical Reagent. Nickel foam (NF) (thickness = 0.5 mm) was provided by Guangdong Candlelight New Energy Technology Co., Ltd.

### 1.2 Synthesis of NiFe LDHs/NF

The NiFe LDHs/NF was fabricated by a one-step hydrothermal method. Prior to the synthesis, NF (2.5 cm x 4 cm) was pretreated ultrasonically in HCl (3.0 M) for 20 minutes to remove the impurities, and then washed it by deionized water and ethanol for several times until pH ~ 7. In a typical process,  $\text{Ni}(\text{NO}_3)_2 \cdot 6\text{H}_2\text{O}$  (1 mmol),  $\text{FeCl}_3 \cdot 6\text{H}_2\text{O}$  (2 mmol),  $\text{NH}_4\text{F}$  (40 mmol) and  $\text{CH}_4\text{N}_2\text{O}$  were dissolved in 40 mL deionized water to form a clear solution and then transferred into a 50 mL Teflon-lined



autoclave. A piece of cleaned NF was immersed into the mixture solution. The autoclave was sealed and maintained at 120 °C for 6 h. After cooled down to room temperature, the NiFe LDHs/NF was washed with deionized water several times and dried at 60 °C for 8 hours.

### 1.3 Synthesis of NiFe LDH/VO(OH)<sub>2</sub>-xh

VCl<sub>3</sub> (1.6 mmol) and CH<sub>4</sub>N<sub>2</sub>O (0.3 g) were dissolved in 40 mL deionized water to form a homogeneous solution. Then, the solution was transferred into a 50 mL Teflon-lined autoclave and the NiFe LDHs/NF was completely immersed into the solution. The autoclave was sealed and heated at 120 °C for x hours (x = 4, 8, 12). After cooled to room temperature, the NF with catalyst was washed with deionized water several times and dried at 60 °C for 8 hours. The as-obtained catalysts are denoted as NiFe LDH/VO(OH)<sub>2</sub>-xh (NFV NSs-xh; x = 4, 8, 12).

### 1.4 Materials characterization

The morphology of the samples was observed by scanning electron microscope (SEM, S-4800, Japan) and transmission electron microscopy (TEM, G2F20, USA). The crystal structure and chemical composition of the samples was analyzed by X-ray diffraction (XRD, Smart Lab) and X-ray photoelectron spectroscopy (XPS, PHI 5000), respectively.

## 1.5 Electrochemical measurements

The electrochemical properties of the materials were evaluated in a three-electrode system on a CHI-660E electrochemical workstation (Chenhua instrument co., LTD., Shanghai) at room temperature. In a standard three-electrode system, the NF (0.5 cm × 0.5 cm) with different samples was directly used as working electrode, then a Hg/HgO electrode and a graphite rod were acted as the reference electrode and the counter electrode, respectively. All measured potentials were calibrated to the reversible hydrogen electrode (RHE) based on the Nernst equation:  $E_{\text{RHE}} = E_{\text{Hg/HgO}} + 0.059 \times \text{pH} + 0.098$ . The steady-state linear sweep voltammetry (LSV) curves were obtained at a scan rate of 2 mV s<sup>-1</sup> in 1.0 M KOH solution. The measurements of electrochemical impedance spectroscopies (EIS) were conducted at a frequency range from 10 KHz to 100 mHz by applying an alternating current (AC) voltage with 10 mV amplitude. The chronoamperometric test (40 h) of NFV NSs-4h for OER was carried out at a current density of 100 mA cm<sup>-2</sup> and cyclic voltammetry (CV) tests of 1000 cycles were conducted at a scan rate of 100 mV s<sup>-1</sup> to investigate the durability of the sample. In

order to determine the electrochemical active surface area (ECSA), the double layer capacitance ( $C_{dl}$ ) of the electrode can be obtained by carrying out the CV measurement and the ECSA can be calculated by  $C_{dl}$  using the formula:  $ECSA = C_{dl} / C_s$  ( $C_s$  is assuming as  $0.040 \text{ mF cm}^{-2}$ ).<sup>9</sup>

## References

1. P. Zhang, L. Li, D. Nordlund, H. Chen, L. Fan, B. Zhang, X. Sheng, Q. Daniel and L. Sun, *Nature Communications*, 2018, 9, 381.
2. V. Maruthapandian, M. Mathankumar, V. Saraswathy, B. Subramanian and S. Muralidharan, *ACS Applied Materials & Interfaces*, 2017, 9, 13132-13141.
3. Y. Qin, F. Wang, J. Shang, M. Iqbal, A. Han, X. Sun, H. Xu and J. Liu, *Journal of Energy Chemistry*, 2020, 43, 104-107.
4. Q. Kong, W. Bai, F. Bai, X. An, W. Feng, F. Zhou, Q. Chen, Q. Wang and C. Sun, *ChemCatChem*, 2020, 12, 2209-2214.
5. L.-C. Zhang, M.-Q. Wang, H. Chen, H. Liu, Y. Wang, L.-Z. Zhang, G.-R. Hou and S.-J. Bao, *Materials Research Bulletin*, 2020, 122.
6. B. Yang, N. Zhang, G. Chen, K. Liu, J. Yang, A. Pan, M. Liu, X.

Liu, R. Ma and T. Qiu, *Applied Catalysis B: Environmental*, 2020, 260.

7. Y. Li, X. Zhou, W. Qi, H. Xie, K. Yin, Y. Tong, J. He, S. Gong and Z. Li, *Chemical Engineering Journal*, 2020, 383.

8. X. F. Lu, L. F. Gu, J. W. Wang, J. X. Wu, P. Q. Liao and G. R. Li, *Adv Mater*, 2017, 29.

9. L. Zhou, M. Guo, Y. Li, Q. Gu, W. Zhang, C. Li, F. Xie, D. Lin and Q. Zheng, *Chem Commun (Camb)*, 2019, 55, 4218-4221.
